# Supplementary material for: The climate effects of increasing ocean albedo: an idealized representation of solar geoengineering
Source: Copernicus journal article supplement (doi:10.5194/acp-18-13097-2018), 2018-09-12
Supplement: Supplementary file 1 [file acp-18-13097-2018-supplement.pdf]

Supplement of Atmos. Chem. Phys., 18, 13097–13113, 2018  
<https://doi.org/10.5194/acp-18-13097-2018-supplement>  
© Author(s) 2018. This work is distributed under  
the Creative Commons Attribution 4.0 License.

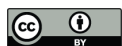

*Supplement of*

## **The climate effects of increasing ocean albedo: an idealized representation of solar geoengineering**

**Ben Kravitz et al.**

*Correspondence to:* Ben Kravitz ([ben.kravitz@pnnl.gov](mailto:ben.kravitz@pnnl.gov))

The copyright of individual parts of the supplement might differ from the CC BY 4.0 License.

39 **Table S1.** Change in top-of-atmosphere net radiative flux (calculated as a difference  
 40 from piControl), averaged over years 11-50. Units are in  $W m^{-2}$ . In each box, the top  
 41 value is the global mean, the middle value is the land mean, and the bottom value is  
 42 the ocean mean.  
 43

|                | abrupt4xCO2 | G1    | G1ocean-Albedo |
|----------------|-------------|-------|----------------|
| BNU-ESM        | 2.70        | 0.02  | 0.39           |
|                | 3.01        | 1.11  | 8.68           |
|                | 2.57        | -0.43 | -3.10          |
| CanESM2        | 2.61        | 0.02  | -0.21          |
|                | 0.91        | 0.27  | 7.86           |
|                | 3.36        | -0.10 | -3.72          |
| CESM-CAM5.1-FV | 2.63        | -0.13 | -1.43          |
|                | 3.50        | 2.09  | 7.61           |
|                | 2.27        | -1.04 | -5.14          |
| CSIRO-Mk3L-1.2 | 2.63        | 0.12  | 0.02           |
|                | 0.48        | 0.60  | 6.40           |
|                | 3.53        | -0.08 | -2.64          |
| EC-Earth       | 2.22        | -0.20 | -0.20          |
|                | 0.36        | 0.04  | 5.75           |
|                | 2.20        | -0.22 | -2.57          |
| GISS-E2-R      | 2.45        | -0.18 | -0.05          |
|                | -0.71       | -1.10 | 5.06           |
|                | 3.75        | 0.21  | -2.15          |
| HadGEM2-ES     | 2.49        | 0.20  | -0.07          |
|                | 2.96        | 2.52  | 10.14          |
|                | 2.31        | -0.74 | -4.18          |
| IPSL-CM5A-LR   | 2.82        | 0.08  | -0.07          |
|                | -0.09       | 0.12  | 6.65           |
|                | 4.06        | 0.07  | -2.93          |
| MIROC-ESM      | 3.62        | 0.23  | 0.13           |
|                | 2.78        | -0.47 | 9.48           |
|                | 3.63        | 0.23  | 0.11           |
| MPI-ESM-LR     | 2.73        | 0.16  | 0.02           |
|                | 1.28        | 1.86  | 8.92           |
|                | 3.32        | -0.53 | -3.58          |
| NorESM1-M      | 2.42        | -0.01 | -0.10          |
|                | 3.64        | 1.49  | 8.23           |
|                | 1.92        | -0.62 | -3.49          |
| Model mean     | 2.67        | 0.03  | -0.14          |
|                | 1.65        | 0.77  | 7.71           |
|                | 2.99        | -0.30 | -3.04          |

44

45 **Table S2.** Temperature trend for each model over years 11-50, as calculated by  
 46 ordinary linear regression. Units are in K per decade. In each box, the top value is  
 47 the global mean, the middle value is the land mean, and the bottom value is the  
 48 ocean mean.  
 49

|                | abrupt4xCO2 | G1    | G1ocean-Albedo |
|----------------|-------------|-------|----------------|
| BNU-ESM        | 0.27        | 0.05  | 0.04           |
|                | 0.28        | 0.09  | 0.06           |
|                | 0.26        | 0.03  | 0.04           |
| CanESM2        | 0.29        | -0.04 | -0.01          |
|                | 0.32        | -0.04 | 0.01           |
|                | 0.27        | -0.04 | -0.02          |
| CESM-CAM5.1-FV | 0.22        | -0.02 | -0.01          |
|                | 0.22        | -0.04 | -0.02          |
|                | 0.22        | -0.01 | -0.01          |
| CSIRO-Mk3L-1.2 | 0.24        | 0.02  | -0.02          |
|                | 0.26        | 0.02  | -0.02          |
|                | 0.23        | 0.01  | -0.02          |
| EC-Earth       | 0.26        | -0.04 | 0.04           |
|                | 0.29        | -0.04 | 0.05           |
|                | 0.25        | -0.04 | 0.03           |
| GISS-E2-R      | 0.10        | 0.01  | -0.04          |
|                | 0.09        | 0.01  | -0.04          |
|                | 0.11        | 0.01  | -0.04          |
| HadGEM2-ES     | 0.30        | 0.04  | 0.11           |
|                | 0.36        | 0.06  | 0.14           |
|                | 0.27        | 0.03  | 0.10           |
| IPSL-CM5A-LR   | 0.38        | 0.02  | -0.05          |
|                | 0.44        | 0.03  | -0.08          |
|                | 0.35        | 0.02  | -0.04          |
| MIROC-ESM      | 0.34        | 0.02  | -0.03          |
|                | 0.40        | 0.03  | -0.02          |
|                | 0.34        | 0.02  | -0.03          |
| MPI-ESM-LR     | 0.22        | 0.03  | 0.02           |
|                | 0.27        | 0.05  | 0.04           |
|                | 0.20        | 0.02  | 0.01           |
| NorESM1-M      | 0.19        | -0.02 | -0.06          |
|                | 0.22        | -0.04 | -0.05          |
|                | 0.17        | -0.02 | -0.06          |
| Model mean     | 0.26        | 0.01  | -0.00          |
|                | 0.29        | 0.01  | 0.01           |
|                | 0.24        | 0.00  | -0.00          |

50

51 **Table S3.** Change (from piControl) in albedo as measured at the top of the  
 52 atmosphere, averaged over years 11-50 of simulation. Calculations are differences  
 53 in ratios of upward to downward shortwave radiative flux at TOA. Values in each  
 54 box are (in order) ensemble minimum, ensemble mean, and ensemble maximum.  
 55 All values are rounded to four decimal places.  
 56

|                | Global | Land  | Ocean |
|----------------|--------|-------|-------|
| abrupt4xCO2    | -0.02  | -0.03 | -0.02 |
|                | -0.01  | -0.02 | -0.01 |
|                | 0.00   | 0.00  | 0.00  |
| G1             | -0.01  | -0.01 | -0.01 |
|                | -0.01  | -0.01 | -0.01 |
|                | -0.00  | 0.00  | -0.00 |
| G1ocean-Albedo | -0.00  | -0.03 | 0.01  |
|                | 0.01   | -0.01 | 0.02  |
|                | 0.02   | 0.00  | 0.03  |

57

58 **Table S4.** Change (from piControl) in surface albedo, averaged over years 11-50 of  
 59 simulation. Calculations are differences in ratios of upward to downward  
 60 shortwave radiative flux at the surface. Values in each box are (in order) ensemble  
 61 minimum, ensemble mean, and ensemble maximum. All values are rounded to four  
 62 decimal places.  
 63

|                | Global | Land  | Ocean |
|----------------|--------|-------|-------|
| abrupt4xCO2    | -0.04  | -0.04 | -0.03 |
|                | -0.02  | -0.02 | -0.02 |
|                | -0.01  | -0.01 | -0.00 |
| G1             | -0.01  | -0.02 | -0.01 |
|                | -0.00  | -0.00 | -0.00 |
|                | 0.00   | 0.00  | 0.00  |
| G1ocean-Albedo | 0.03   | -0.02 | 0.06  |
|                | 0.06   | -0.00 | 0.09  |
|                | 0.09   | 0.00  | 0.13  |

64

65 **Table S5.** Change in surface air temperature (K) from piControl, averaged over  
 66 years 11-50 of simulation. Values in each box are (in order) ensemble minimum,  
 67 ensemble mean, and ensemble maximum. All values are rounded to four decimal  
 68 places.  
 69

|                | Global | Land  | Ocean |
|----------------|--------|-------|-------|
| abrupt4xCO2    | 2.79   | 4.04  | 2.28  |
|                | 4.42   | 5.93  | 3.80  |
|                | 5.29   | 7.30  | 4.65  |
| G1             | -0.31  | -0.24 | -0.38 |
|                | 0.02   | 0.24  | -0.07 |
|                | 0.64   | 0.81  | 0.57  |
| G1ocean-Albedo | -0.12  | 0.41  | -0.33 |
|                | 0.36   | 1.14  | 0.04  |
|                | 1.20   | 1.83  | 0.95  |

70

71 **Table S6.** Change in TOA net radiative flux ( $W m^{-2}$ ) from piControl, averaged over  
 72 years 11-50 of simulation. Values in each box are (in order) ensemble minimum,  
 73 ensemble mean, and ensemble maximum. All values are rounded to four decimal  
 74 places.  
 75

|                | Global | Land  | Ocean |
|----------------|--------|-------|-------|
| abrupt4xCO2    | 2.22   | -0.66 | 1.92  |
|                | 2.65   | 1.71  | 3.04  |
|                | 3.62   | 3.64  | 4.01  |
| G1             | -0.20  | -1.07 | -1.03 |
|                | 0.03   | 0.74  | -0.26 |
|                | 0.23   | 2.45  | 0.54  |
| G1ocean-Albedo | -1.45  | 4.85  | -5.11 |
|                | -0.14  | 7.22  | -3.18 |
|                | 0.39   | 9.73  | -2.06 |

76

77 **Table S7.** Change in Horizontal Energy Transport (Section 3.3;  $W m^{-2}$ ) from  
 78 piControl, averaged over years 11-50 of simulation.  
 79

|                | abrupt4xCO2 | G1   | G1ocean-Albedo |
|----------------|-------------|------|----------------|
| BNU-ESM        | 0.88        | 0.13 | 1.46           |
| CanESM2        | 0.27        | 0.77 | 2.46           |
| CESM-CAM5.1-FV | 1.02        | 0.88 | 2.36           |
| CSIRO-Mk3L-1.2 | 0.17        | 0.26 | 1.89           |
| EC-Earth       | 0.09        | 0.43 | 2.02           |
| GISS-E2-R      | -0.21       | 0.72 | 1.35           |
| HadGEM2-ES     | 0.84        | 1.03 | 2.54           |
| IPSL-CM5A-LR   | -0.04       | 0.82 | 1.80           |
| MIROC-ESM      | 0.81        | 0.29 | 2.67           |
| MPI-ESM-LR     | 0.35        | 0.99 | 2.45           |
| NorESM1-M      | 1.07        | 0.92 | 3.21           |
| Model mean     | 0.47        | 0.66 | 2.20           |

80



81 **Table S8.** Change in net shortwave radiative flux at the surface ( $W m^{-2}$ ) from  
 82 piControl, averaged over years 11-50 of simulation. Values in each box are (in  
 83 order) ensemble minimum, ensemble mean, and ensemble maximum. All values are  
 84 rounded to four decimal places.

85

|                | Global | Land  | Ocean  |
|----------------|--------|-------|--------|
| abrupt4xCO2    | -2.17  | -3.52 | -3.06  |
|                | -0.28  | 1.56  | -1.04  |
|                | 1.86   | 4.12  | 2.01   |
| G1             | -6.41  | -6.52 | -6.69  |
|                | -5.00  | -4.08 | -5.38  |
|                | -4.01  | -1.70 | -3.65  |
| G1ocean-Albedo | -9.87  | -3.60 | -13.01 |
|                | -7.83  | -0.21 | -10.97 |
|                | -6.07  | 2.79  | -8.54  |

86

87 **Table S9.** Change in net longwave radiative flux at the surface ( $W\ m^{-2}$ ) from  
 88 piControl, averaged over years 11-50 of simulation. Values in each box are (in  
 89 order) ensemble minimum, ensemble mean, and ensemble maximum. All values are  
 90 rounded to four decimal places.

91

|                | Global | Land  | Ocean |
|----------------|--------|-------|-------|
| abrupt4xCO2    | 4.22   | 1.80  | 4.53  |
|                | 6.61   | 3.75  | 7.78  |
|                | 8.63   | 6.31  | 9.80  |
| G1             | 0.77   | 0.30  | 0.44  |
|                | 1.27   | 1.54  | 1.17  |
|                | 2.51   | 3.69  | 2.27  |
| G1ocean-Albedo | 1.02   | -0.15 | 0.96  |
|                | 2.57   | 2.05  | 2.78  |
|                | 6.25   | 4.74  | 7.22  |

92

93 **Table S10.** Change in sensible heat flux from the surface to the atmosphere  
 94 (positive upward;  $W\ m^{-2}$ ) from piControl, averaged over years 11-50 of simulation.  
 95 Values in each box are (in order) ensemble minimum, ensemble mean, and  
 96 ensemble maximum. All values are rounded to four decimal places.  
 97

|                | Global | Land  | Ocean |
|----------------|--------|-------|-------|
| abrupt4xCO2    | -2.36  | 0.73  | -4.46 |
|                | -1.14  | 3.85  | -3.19 |
|                | 0.14   | 6.64  | -2.25 |
| G1             | -1.16  | -1.73 | -1.05 |
|                | -0.21  | 1.13  | -0.76 |
|                | 0.81   | 3.89  | -0.28 |
| G1ocean-Albedo | -1.85  | -0.99 | -2.20 |
|                | -0.20  | 2.87  | -1.47 |
|                | 1.05   | 6.00  | -0.34 |

98

99 **Table S11.** Change in latent heat flux from the surface to the atmosphere (positive  
 100 upward;  $W m^{-2}$ ) from piControl, averaged over years 11-50 of simulation. Values in  
 101 each box are (in order) ensemble minimum, ensemble mean, and ensemble  
 102 maximum. All values are rounded to four decimal places.  
 103

|                | Global | Land  | Ocean |
|----------------|--------|-------|-------|
| abrupt4xCO2    | 1.40   | -4.75 | 3.93  |
|                | 4.90   | 1.10  | 6.47  |
|                | 7.24   | 6.50  | 8.38  |
| G1             | -5.99  | -8.64 | -4.89 |
|                | -3.57  | -3.64 | -3.55 |
|                | -1.23  | 1.12  | -2.20 |
| G1ocean-Albedo | -7.27  | -6.47 | -7.89 |
|                | -5.05  | -1.01 | -6.71 |
|                | -2.15  | 4.64  | -4.95 |

104

105 **Table S12.** Change in  $\Delta B$  (Equation 8;  $W m^{-2}$ ) from piControl, averaged over years  
 106 11-50 of simulation. Values in each box are (in order) ensemble minimum,  
 107 ensemble mean, and ensemble maximum. All values are rounded to four decimal  
 108 places.  
 109

|                | Global | Land  | Ocean |
|----------------|--------|-------|-------|
| abrupt4xCO2    | 2.17   | -0.15 | 2.97  |
|                | 2.57   | 0.20  | 3.44  |
|                | 3.26   | 0.44  | 3.98  |
| G1             | -0.21  | -0.12 | -0.28 |
|                | 0.05   | -0.04 | 0.08  |
|                | 0.29   | 0.04  | 0.39  |
| G1ocean-Albedo | -0.29  | -0.14 | -0.37 |
|                | 0.01   | -0.01 | 0.02  |
|                | 0.57   | 0.14  | 0.75  |

110

111 **Table S13.** Change in precipitation (mm day<sup>-1</sup>) from piControl, averaged over years  
 112 11-50 of simulation. Values in each box are (in order) ensemble minimum,  
 113 ensemble mean, and ensemble maximum. All values are rounded to four decimal  
 114 places.  
 115

|                | Global | Land  | Ocean |
|----------------|--------|-------|-------|
| abrupt4xCO2    | 0.05   | -0.08 | 0.09  |
|                | 0.17   | 0.13  | 0.19  |
|                | 0.28   | 0.24  | 0.33  |
| G1             | -0.21  | -0.28 | -0.19 |
|                | -0.12  | -0.11 | -0.13 |
|                | -0.06  | -0.01 | -0.07 |
| G1ocean-Albedo | -0.26  | -0.14 | -0.36 |
|                | -0.19  | 0.05  | -0.29 |
|                | -0.11  | 0.20  | -0.22 |

116

117 **Table S14.** Change in evaporation (mm day<sup>-1</sup>) from piControl, averaged over years  
 118 11-50 of simulation. Values in each box are (in order) ensemble minimum,  
 119 ensemble mean, and ensemble maximum. All values are rounded to four decimal  
 120 places.  
 121

|                | Global | Land  | Ocean |
|----------------|--------|-------|-------|
| abrupt4xCO2    | 0.05   | -0.16 | 0.14  |
|                | 0.18   | 0.04  | 0.23  |
|                | 0.28   | 0.23  | 0.39  |
| G1             | -0.21  | -0.30 | -0.17 |
|                | -0.12  | -0.13 | -0.12 |
|                | -0.04  | 0.04  | -0.08 |
| G1ocean-Albedo | -0.25  | -0.22 | -0.27 |
|                | -0.18  | -0.04 | -0.23 |
|                | -0.07  | 0.16  | -0.17 |

122

123 **Table S15.** Change in precipitation minus evaporation (mm day<sup>-1</sup>) from piControl,  
 124 averaged over years 11-50 of simulation. Values in each box are (in order)  
 125 ensemble minimum, ensemble mean, and ensemble maximum. All values are  
 126 rounded to four decimal places.  
 127

|                | Global | Land  | Ocean |
|----------------|--------|-------|-------|
| abrupt4xCO2    | -0.06  | -0.01 | -0.09 |
|                | -0.01  | 0.09  | -0.05 |
|                | 0.00   | 0.20  | -0.01 |
| G1             | -0.01  | -0.05 | -0.04 |
|                | -0.00  | 0.02  | -0.01 |
|                | 0.00   | 0.11  | 0.01  |
| G1ocean-Albedo | -0.19  | -0.18 | -0.19 |
|                | -0.02  | 0.09  | -0.06 |
|                | 0.00   | 0.18  | -0.01 |



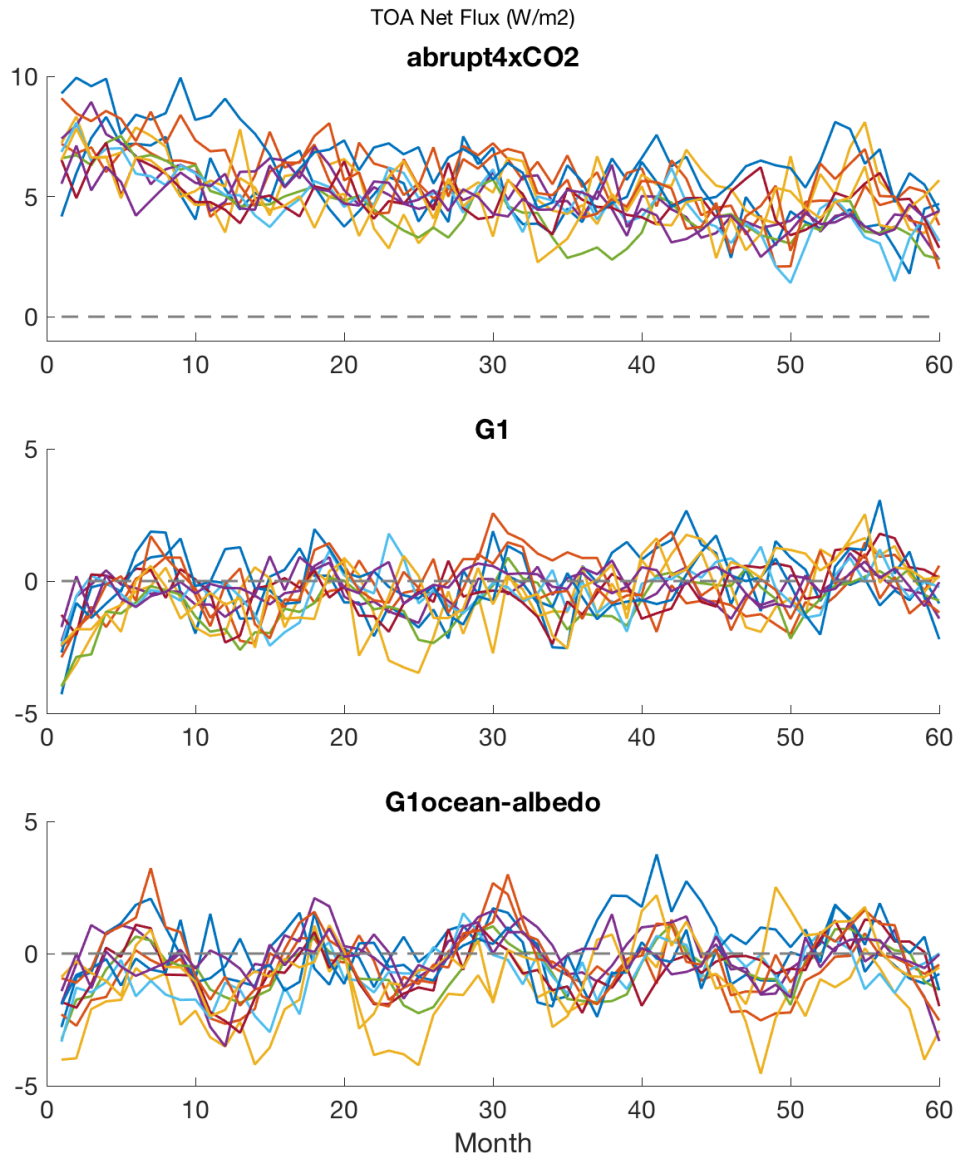

128

129

130 **Figure S1.** Top-of-atmosphere net radiative flux change ( $W\ m^{-2}$ ) in the  
 131 abrupt4xCO<sub>2</sub> (top), G1 (middle), and G1ocean-albedo (bottom) experiments. Each  
 132 color represents a different model. All values are subtracted month-by-month from  
 133 the corresponding months of the preindustrial control simulation for the first 60  
 134 months (5 years) of simulation.

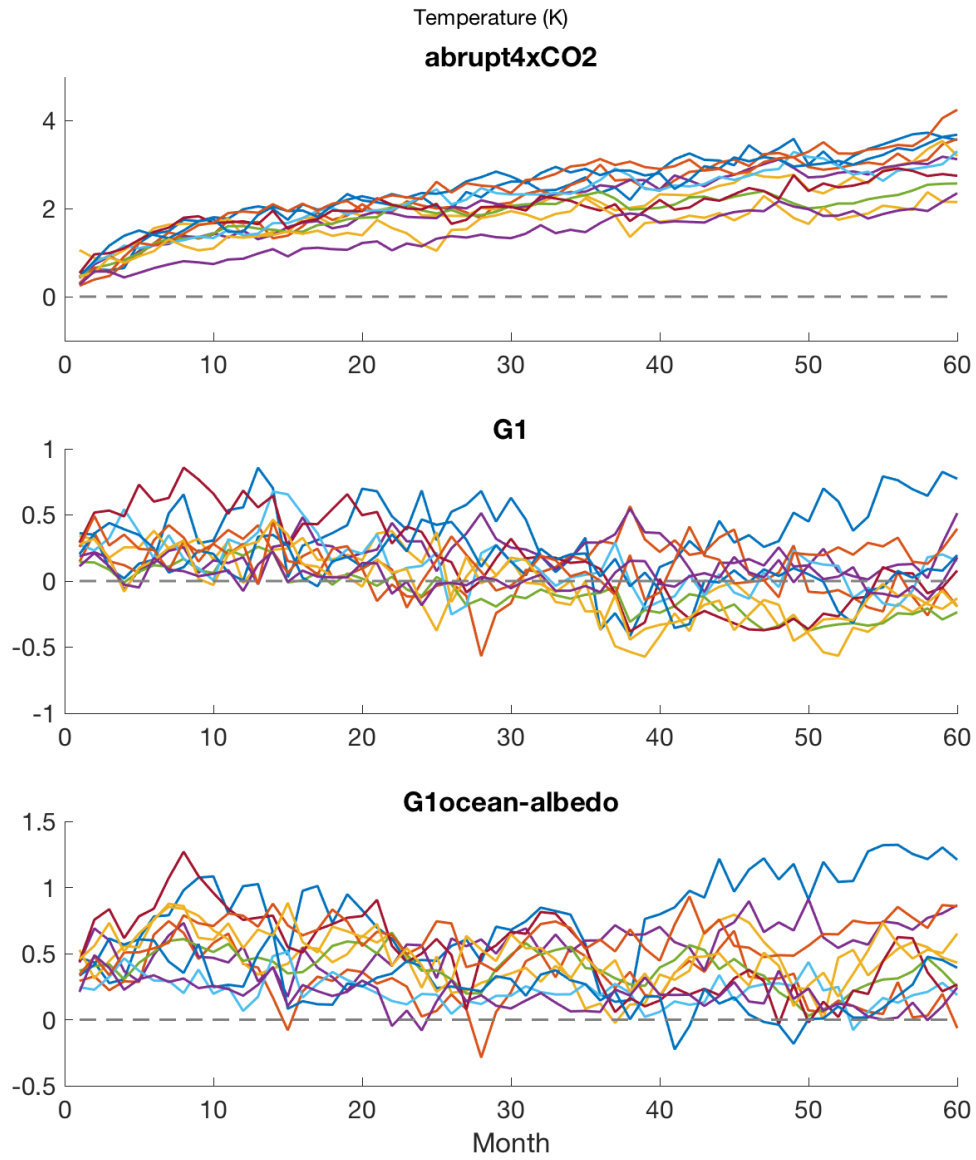

135  
136  
137

**Figure S2.** As in Figure S1 but for global mean temperature change (K).

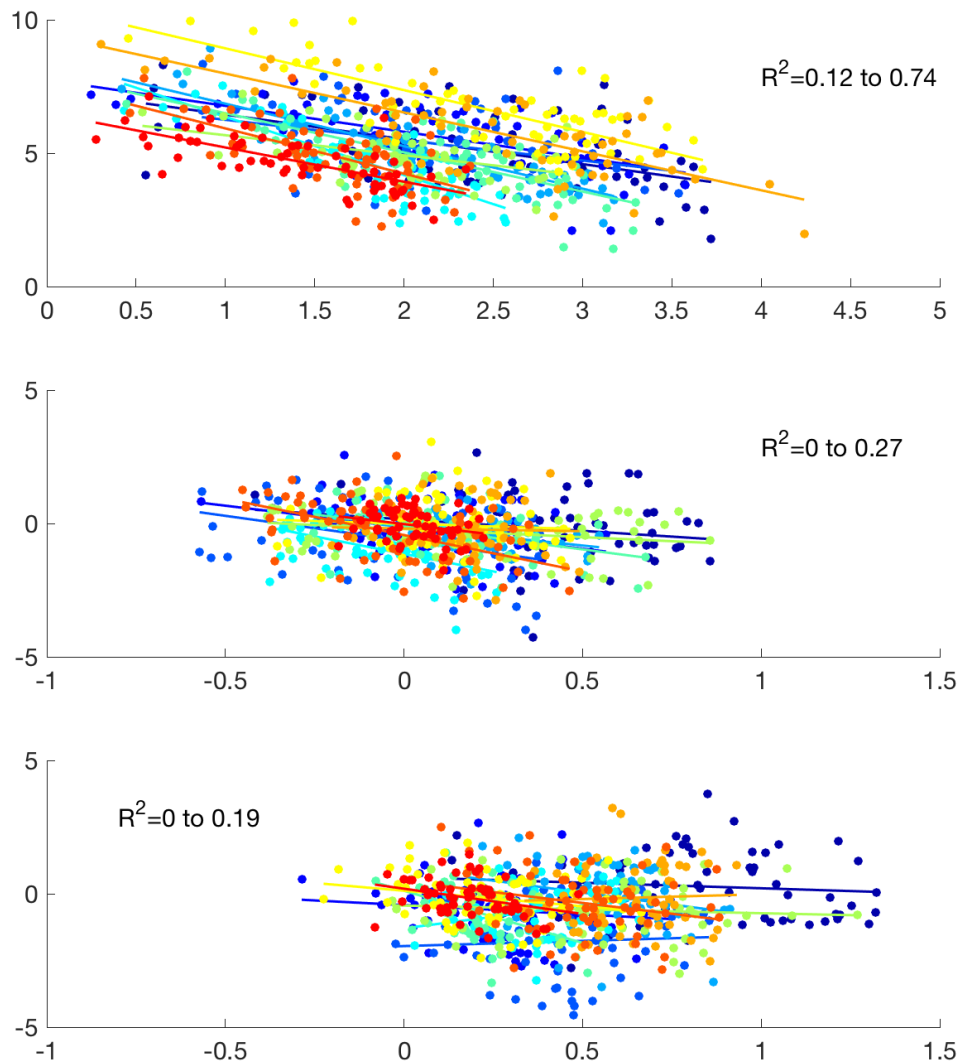

138  
139

140 **Figure S3.** Gregory plots (Gregory et al., 2004), as described in Section 3.2 of the  
141 main text. Top panel corresponds to abrupt4xCO2, middle panel corresponds to G1,  
142 and bottom panel corresponds to G1ocean-albedo. All values are monthly averages  
143 over the first five years of simulation, essentially scatter plots of the values in  
144 Figures S1 (net TOA radiative flux change; y-axis in this figure) and S2 (global mean  
145 temperature change; x-axis in this figure). Each color represents a different model.  
146 Lines are obtained through ordinary least squares regression through the points of  
147 the same color.  $R^2$  ranges indicate the minimum and maximum  $R^2$  value among the  
148 model ensemble in each panel.
